# Supplementary material
Source: publisher site journal article supplement (https://www.dovepress.com/article/supplementary_file/564171/564171%20Revised%20Supplemental%20Tables%201-14.docx)
Supplement: Supplementary file 1 [file 564171%20Revised%20Supplemental%20Tables%201-14.docx]

# **Supplemental Tables**

**Supplemental Table 1. Age, exposure time, and resolution time of drug-induced uveitis by uveitis location**

| Uveitis location | n (Age) | Mean age ± SD (years) | n (Exposure) | Mean exposure ± SD (days) | n (Resolution) | Mean resolution ± SD (days) |
| --- | --- | --- | --- | --- | --- | --- |
| Anterior | 440 | 53.90 ± 21.43 | 389 | 191.52 ± 529.64 | 248 | 52.81 ± 176.42 |
| Intermediate | 10 | 53.80 ± 22.51 | 10 | 443.20 ± 730.41 | 8 | 58.75 ± 24.31 |
| Panuveitis | 115 | 54.21 ± 16.50 | 111 | 202.19 ± 433.45 | 74 | 94.70 ± 129.91 |
| Posterior | 24 | 54.92 ± 22.83 | 30 | 220.17 ± 366.60 | 13 | 91.00 ± 107.93 |

**Supplemental Table 2. Laterality of uveitis by route of drug administration**

| **Route of Drug Administration** | **N** | **Unilateral uveitis %** | **Bilateral uveitis %** | **Statistically Significant?** | **Direction of Significance** |
| --- | --- | --- | --- | --- | --- |
| **Intravenous** | 201 | 32.8% | 67.2% | No |  |
| **Oral** | 181 | 24.9% | 75.1% | Yes, p<0.001 | % Bilateral higher than expected |
| **Intramuscular** | 55 | 49.1% | 50.9% | Yes, p=0.045 | % Bilateral lower than expected |
| **Topical** | 85 | 35.3% | 64.7% | No |  |
| **Intravitreal** | 41 | 92.7% | 7.3% | Yes, p<0.001 | % Bilateral lower than expected |
| **Subcutaneous** | 35 | 37.1% | 62.9% | No |  |
| **Subconjunctival** | 5 | 100.0% | 0.0% | Yes, p=0.003 | % Bilateral lower than expected |
| **Intravesical** | 2 | 0.0% | 100.0% | No |  |
| **Intracameral** | 2 | 100.0% | 0.0% | No |  |
| **Intracutaneous** | 1 | 100.0% | 0.0% | No |  |
| **All patients** | **622** | **36.7%** | **63.3%** |  |  |

**Supplemental Table 3. Laterality of uveitis by conditions predisposing to uveitis**

| **Predisposing condition** | **N** | **Unilateral uveitis %** | **Bilateral uveitis %** | **Statistically Significant?** | **Direction of Significance** |
| --- | --- | --- | --- | --- | --- |
| **Cancer** | 212 | 16.5% | 83.5% | Yes, p<0.001 | % Bilateral higher than expected |
| **Autoimmune** | 78 | 44.9% | 55.1% | No |  |
| **HIV/AIDS** | 39 | 59.0% | 41.0% | Yes, p=0.003 | % Bilateral lower than expected |
| **All patients** | **622** | **36.7%** | **63.3%** |  |  |

Abbreviations: HIV/AIDS: Human Immunodeficiency Virus/Acquired Immunodeficiency Syndrome.

**Supplemental Table 4. Uveitis location by conditions predisposing to uveitis**

| **Predisposing condition** | **N** | **% Anterior** | **% Intermediate** | **% Posterior** | **% Panuveitis** | **Statistically Significant?** | **Direction of Significance** |
| --- | --- | --- | --- | --- | --- | --- | --- |
| **Cancer** | 204 | 51.0% | 3.9% | 6.4% | 35.3% | Yes, p<0.001  p<0.001  p<0.001 | % Anterior lower than expected  % Intermediate higher than expected  % Panuveitis higher than expected |
| **Auto immune** | 73 | 78.1% | 1.4% | 1.4% | 17.8% | No |  |
| **HIV/AIDS** | 39 | 89.7% | 0.0% | 2.6% | 7.7% | Yes,  p<0.001 | % Anterior higher than expected |
| **All patients** | **616** | **65.1%** | **1.4%** | **4.6%** | **16.7%** |  |  |

Abbreviations: HIV/AIDS: Human Immunodeficiency Virus/Acquired Immunodeficiency Syndrome.

**Supplemental Table 5. Complete list of drugs inducing uveitis from published manuscripts, case series, case reports, and abstracts**

| **Drug** | **Frequency** | **Percentage of drug class** |
| --- | --- | --- |
| **Antineoplastic** | 201 |  |
| Checkpoint inhibitor | 105 | 52.24% |
| BRAF inhibitor + MEK inhibitor | 27 | 13.43% |
| BTK inhibitor | 19 | 9.45% |
| TK inhibitor | 11 | 5.47% |
| Antimetabolite | 11 | 5.47% |
| BRAF inhibitor | 9 | 4.48% |
| Monoclonal antibody | 7 | 3.48% |
| Checkpoint inhibitor + BRAF inhibitor + MEK inhibitor | 3 | 1.49% |
| Checkpoint inhibitor + monoclonal antibody | 1 | 0.50% |
| Checkpoint inhibitor + PARP inhibitor | 1 | 0.50% |
| Checkpoint inhibitor + TK inhibitor | 1 | 0.50% |
| Checkpoint inhibitor + VEGF-inhibitor | 1 | 0.50% |
| Chemotherapy | 1 | 0.50% |
| Cytokine | 1 | 0.50% |
| Cytokine + Immunotherapy | 1 | 0.50% |
| JAK inhibitor | 1 | 0.50% |
| Taxane | 1 | 0.50% |
| **Vaccine** | 109 |  |
| Covid-19 vaccine | 44 | 40.37% |
| Hepatitis B vaccine | 33 | 30.28% |
| HPV vaccine | 26 | 23.85% |
| Yellow fever vaccine | 2 | 1.83% |
| BCG vaccine | 1 | 0.92% |
| Influenza vaccine | 1 | 0.92% |
| Hepatitis A + polio + tetanus + meningococcal vaccine | 1 | 0.92% |
| Varicella vaccine | 1 | 0.92% |
| **Antibiotic** | 90 |  |
| Fluoroquinolone | 40 | 44.44% |
| Rifabutin | 39 | 43.33% |
| Sulfonamide antibiotic | 5 | 5.56% |
| Unspecified antibiotic | 5 | 5.56% |
| Cephalosporin | 1 | 1.11% |
| Methenamine hippurate | 1 | 1.11% |
| **IOP-lowering drop** | 82 |  |
| Alpha-2 agonist | 47 | 57.32% |
| Beta blocker | 23 | 28.05% |
| Prostaglandin analog | 11 | 13.41% |
| **Bisphosphonate** | 67 |  |
| **VEGF-inhibitor** | 44 |  |
| **Antiviral** | 35 |  |
| Cidofovir | 15 | 42.86% |
| Interferon alpha + ribavirin | 12 | 34.29% |
| Ledipasvir-Sofosbuvir | 6 | 17.14% |
| Interferon alpha | 2 | 5.71% |
| **DMARD** | 30 |  |
| TNF inhibitor | 29 | 96.67% |
| Selective T-cell costimulation modulator | 1 | 3.33% |
| **Other** | 32 |  |
| Antiepileptic | 5 | 15.63% |
| Antiparasitic | 3 | 9.38% |
| Thrombolytic | 3 | 9.38% |
| Aromatase inhibitor | 2 | 6.25% |
| BCG | 2 | 6.25% |
| Acetaminophen + opioid | 1 | 3.13% |
| Anesthetic | 1 | 3.13% |
| Antifungal | 1 | 3.13% |
| Antihistamine | 1 | 3.13% |
| Bisphosphonate + antineoplastic | 1 | 3.13% |
| Bisphosphonate + IOP-lowering drop | 1 | 3.13% |
| Bone marrow transplant | 1 | 3.13% |
| Botulinum toxin | 1 | 3.13% |
| Capsaicin | 1 | 3.13% |
| Contrast | 1 | 3.13% |
| IVIG | 1 | 3.13% |
| NSAID | 1 | 3.13% |
| PCSK9 inhibitor | 1 | 3.13% |
| PPI | 1 | 3.13% |
| SERM | 1 | 3.13% |
| SSRI | 1 | 3.13% |
| Topical keratolytic | 1 | 3.13% |
| **Total** | **690** |  |

Abbreviations: BRAF: B-Raf proto-oncogene, serine/threonine kinase; MEK: Mitogen-activated protein kinase kinase; BTK: Bruton's Tyrosine Kinase; TK: Tyrosine Kinase; PARP: Poly (ADP-Ribose) Polymerase; VEGF: Vascular Endothelial Growth Factor; JAK: Janus Kinase. Covid-19: Coronavirus Disease 2019; HPV: Human Papillomavirus; BCG: Bacillus Calmette-Guerin. IOP: intraocular pressure; TNF: Tumor Necrosis Factor; T-cell: thymus-derived cell; IVIG: intravenous immunoglobulin; NSAID: nonsteroidal anti-inflammatory drug; PCSK9: proprotein convertase subtilisin/kexin type 9; PPI: proton pump inhibitor; SERM: selective estrogen receptor modulator; SSRI: selective serotonin reuptake inhibitors.

**Supplemental Table 6. Characteristics of patients with uveitis induced by antineoplastics**

|  | **Mean** | **Standard Deviation** | **Range** |
| --- | --- | --- | --- |
| **Age (years)** | 58.49 | 15.05 | 7-84 |
| **Exposure time (days)** | 199.58 | 344.65 | 1-2120 |
| **Resolution time (days)** | 71.32 | 92.86 | 4-420 |
|  | | | |
|  |  | **Percentage** | **Significance?** |
| **Sex**  **(n = 49)** | **Female** | 46.2% | % Male higher than expected, p=0.0006 |
| **Male** | 53.8% |
| **Laterality**  **(n = 200)** | **Unilateral** | 16.5% | % Bilateral higher than expected, p<0.0001 |
| **Bilateral** | 83.5% |
| **Uveitis location**  **(n = 187)** | **Anterior** | 50.3% | % Anterior lower than expected, p<0.0001  % Panuveitis higher than expected, p<0.0001 |
| **Intermediate** | 4.3% |
| **Posterior** | 7.0% |
| **Panuveitis** | 38.5% |

**Supplemental Table 7. Characteristics of patients with uveitis induced by vaccines**

|  | **Mean** | **Standard Deviation** | **Range** |
| --- | --- | --- | --- |
| **Age (years)** | 32.69 | 18.44 | 1-79 |
| **Exposure time (days)** | 26.08 | 76.86 | 0-476 |
| **Resolution time (days)** | 41.65 | 51.21 | 3-270 |
|  | | | |
|  |  | **Percentage** | **Significance?** |
| **Sex**  **(n = 108)** | **Female** | 71.3% | % Male lower than expected, p=0.0006 |
| **Male** | 28.7% |
| **Laterality**  **(n = 108)** | **Unilateral** | 50.9% | % Bilateral lower than expected, p=0.0231 |
| **Bilateral** | 49.1% |
| **Uveitis location**  **(n = 106)** | **Anterior** | 82.2% | % Anterior higher than expected, p<0.0001 |
| **Intermediate** | 0.0% |
| **Posterior** | 4.7% |
| **Panuveitis** | 12.1% |

**Supplemental Table 8. Characteristics of patients with uveitis induced by antibiotics**

|  | **Mean** | **Standard Deviation** | **Range** |
| --- | --- | --- | --- |
| **Age (years)** | 44.68 | 17.85 | 2-77 |
| **Exposure time (days)** | 65.22 | 85.01 | 0-345 |
| **Resolution time (days)** | 24.13 | 18.10 | 3-60 |
|  | | | |
|  |  | **Percentage** | **Significance?** |
| **Sex**  **(n = 49)** | **Female** | 32.7% | % Male higher than expected, p=0.0006 |
| **Male** | 67.3% |
| **Laterality**  **(n = 90)** | **Unilateral** | 31.1% |  |
| **Bilateral** | 68.9% |  |
| **Uveitis location**  **(n = 54)** | **Anterior** | 87.0% | % Anterior higher than expected, p=0.0015  % Panuveitis lower than expected, p=0.0275 |
| **Intermediate** | 1.9% |
| **Posterior** | 3.7% |
| **Panuveitis** | 7.4% |

**Supplemental Table 9. Characteristics of patients with uveitis induced by intraocular pressure (IOP) lowering drops**

|  | **Mean** | **Standard Deviation** | **Range** |
| --- | --- | --- | --- |
| **Age (years)** | 74.66 | 17.75 | 11-84 |
| **Exposure time (days)** | 629 | 789.04 | 0-4270 |
| **Resolution time (days)** | 99.47 | 332.54 | 7-2520 |
|  | | | |
|  |  | **Percentage** | **Significance?** |
| **Sex**  **(n = 65)** | **Female** | 63.1% | No |
| **Male** | 36.9% |
| **Laterality**  **(n = 81)** | **Unilateral** | 34.6% | No |
| **Bilateral** | 65.4% |
| **Uveitis location**  **(n = 67)** | **Anterior** | 100.0% | No |
| **Intermediate** | 0.0% |
| **Posterior** | 0.0% |
| **Panuveitis** | 0.0% |

**Supplemental Table 10. Characteristics of patients with uveitis induced by bisphosphonates**

|  | **Mean** | **Standard Deviation** | **Range** |
| --- | --- | --- | --- |
| **Age (years)** | 65.12 | 10.92 | 26-88 |
| **Exposure time (days)** | 49.03 | 208.73 | 0-1270 |
| **Resolution time (days)** | 22.63 | 22.07 | 1-90 |
|  | | | |
|  |  | **Percentage** | **Significance?** |
| **Sex**  **(n = 58)** | **Female** | 70.7% | % Male lower than expected, p=0.0189 |
| **Male** | 29.3% |
| **Laterality**  **(n = 67)** | **Unilateral** | 65.7% | % Bilateral lower than expected, p<0.0001 |
| **Bilateral** | 34.3% |
| **Uveitis location**  **(n = 60)** | **Anterior** | 93.3% | % Anterior higher than expected, p<0.0001  % Panuveitis lower than expected, p<0.0001 |
| **Intermediate** | 0.0% |
| **Posterior** | 6.7% |
| **Panuveitis** | 0.0% |

**Supplemental Table 11. Characteristics of patients with uveitis induced by vascular endothelial growth factor (VEGF) inhibitors**

|  | **Mean** | **Standard Deviation** | **Range** |
| --- | --- | --- | --- |
| **Age (years)** | 72.95 | 10.50 | 29-88 |
| **Exposure time (days)** | 15.48 | 28.17 | 0-128 |
| **Resolution time (days)** | 25.71 | 37.75 | 3-225 |
|  | | | |
|  |  | **Percentage** | **Significance?** |
| **Sex**  **(n = 43)** | **Female** | 69.8% | No |
| **Male** | 30.2% |
| **Laterality**  **(n = 41)** | **Unilateral** | 92.7% | % Bilateral lower than expected, p<0.0001 |
| **Bilateral** | 7.3% |
| **Uveitis location**  **(n = 43)** | **Anterior** | 81.4% | No |
| **Intermediate** | 0.0% |
| **Posterior** | 2.3% |
| **Panuveitis** | 16.3% |

**Supplemental Table 12. Characteristics of patients with uveitis induced by antivirals**

|  | **Mean** | **Standard Deviation** | **Range** |
| --- | --- | --- | --- |
| **Age (years)** | 46.68 | 11.68 | 30-73 |
| **Exposure time (days)** | 161.52 | 287.33 | 2-1240 |
| **Resolution time (days)** | 188.29 | 192.53 | 14-600 |
|  | | | |
|  |  | **Percentage** | **Significance?** |
| **Sex**  **(n = 29)** | **Female** | 48.3% | No |
| **Male** | 51.7% |
| **Laterality**  **(n = 35)** | **Unilateral** | 31.4% | No |
| **Bilateral** | 68.6% |
| **Uveitis location**  **(n = 35)** | **Anterior** | 45.7% | % Anterior lower than expected, p=0.0007  % Posterior higher than expected, p=0.0009  % Panuveitis higher than expected, p=0.0030 |
| **Intermediate** | 0.0% |
| **Posterior** | 17.1% |
| **Panuveitis** | 37.1% |

**Supplemental Table 13. Characteristics of patients with uveitis induced by disease-modifying antirheumatic drugs (DMARDs)**

|  | **Mean** | **Standard Deviation** | **Range** |
| --- | --- | --- | --- |
| **Age (years) (n = 673)** | 40.47 | 17.75 | 11-84 |
| **Exposure time (days) (n = 610)** | 665.71 | 1330.05 | 7-6205 |
| **Resolution time (days) (n = 379)** | 96.13 | 156.69 | 3-480 |
|  | | | |
|  |  | **Percentage** | **Significance?** |
| **Sex**  **(n = 30)** | **Female** | 60.0% | No |
| **Male** | 40.0% |
| **Laterality**  **(n = 30)** | **Unilateral** | 46.7% | No |
| **Bilateral** | 53.3% |
| **Uveitis location**  **(n = 26)** | **Anterior** | 76.9% | No |
| **Intermediate** | 3.8% |
| **Posterior** | 0.0% |
| **Panuveitis** | 19.2% |

**Supplemental Table 14. Incidences of medication-induced uveitis of various medication classes reported in the literature**

| **Drug Class** | **Drug(s)** | **Incidence / Risk Figures** | **Study Type & Population** | **Citation** |
| --- | --- | --- | --- | --- |
| **Immune Checkpoint Inhibitors** | All | **0.3% (26/8,678)** developed non-infectious uveitis  **3,740 per 100,000 PY** (anterior uveitis across all ICIs) | Retrospective cohort, retrospective from IRIS | 10,21 |
|  | CTLA-4 inhibitor | **1.29% (11/852)** anterior uveitis with CTLA-4 inhibitors  **8,209 per 100,000 PY (**anterior uveitis with ipilimumab) | Retrospective cohort from TriNetX, Retrospective study from IRIS registry | 11,21 |
|  | PD-1 inhibitor | **0.27% (73/26,736)** anterior uveitis with PD-1 inhibitors  **2,542 per 100,000 PY** (anterior uveitis with nivolumab)  **2,451 per 100,000 PY** (anterior uveitis with pembrolizumab) | Retrospective cohort from TriNetX, Retrospective study from IRIS registry | 11,21 |
|  | PD-L1 inhibitor | **0.14%** (reported <10 patients out of 6,440 treated with PD-L1 inhibitors) | Retrospective cohort from TriNetX | 11 |
| **BRAF/MEK inhibitors** | BRAF inhibitors | **~1% (9/901)** developed new uveitis  **2.27% (9/399)** developed noninfectious uveitis | Retrospective chart reviews | 30,31 |
|  | BRAF/MEK | **4 patients out of 65 (~6.1%)** developed VKH-like uveitis | Retrospective study | 32 |
| **Antineoplastics** | High-dose cytarabine (>1 g/m²) | Incidence not quantified; prophylactic topical corticosteroids *substantially reduce incidence and severity* | Toxicity review; systemic chemotherapy patients | 34 |
| **Antineoplastics** | Sorafenib + Erlotinib | 1 patient with grade ≥3 uveitis in early expansion cohort | Phase I expansion cohort in advanced solid tumors | 35 |
| **Vaccines (General)** | Multiple vaccine classes (HBV, HPV, MMR, VZV, influenza, COVID-19) | **8–13 per 100,000 per year** (general post-vaccination uveitis rate) | Large aggregated review of pre-COVID literature | 36 |
| **COVID-19 Inactivated Vaccines** | Sinopharm/Sinovac (China) | **n=24 series:** white-dot syndromes (10), uveitis (9), retinal vascular events (5); **6 bilateral / 18 unilateral**; median onset **6 ± 5 days** | Multicenter case series | 37 |
|  | Sinopharm/Sinovac | **n=5 series:** anterior uveitis (3), herpetic keratitis/iridocyclitis (1), posterior uveitis (1); mean onset ~13 days | Single-center case series | 38 |
| **Antibiotics** | Oral FQs (class-wide) | **HR 0.96–1.05** for uveitis at 30–90 days (NS); **HR 1.11** at 365 days | Retrospective cohort (4.39M new users) | 43 |
|  | Moxifloxacin | HR **~1.47–1.75** at 365 days | Same cohort secondary analysis | 43 |
|  | Oral FQs | Typical onset **~2–4 weeks** post-exposure | Case series + reviews | 41-43 |
|  | Rifabutin | **24 out of 63 patients** developed uveitis with high dose (600 mg) rifabutin | Retrospective multicenter | 44 |
| **Beta-Blockers (Topical)** | Metipranolol (UK cluster) | **~50 patients** with granulomatous anterior uveitis reported | National cluster, clinical reports | 53,108 |
|  | Metipranolol (German multicenter study) | **0.4% (5/1,306)** developed new uveitis; none required cessation | Retrospective multicenter | 54 |
| **Prostaglandin Analogs** | Latanoprost | **1.0% (5/505 eyes)** developed mild anterior inflammation | Retrospective chart review | 56 |
|  | Latanoprost (eyes with prior quiescent uveitis) | **23.1% (3/13 eyes)** developed mild recurrence | Same series | 56 |
|  | Latanoprost (drug evaluation review) | Approx. **1%** anterior uveitis observed in clinical use | Comprehensive drug evaluation | 55 |
|  | PGAs (general) | ~**5%** risk of anterior uveitis within several months | Medication-induced uveitis review | 12 |
|  | SOURCE Database (PGAs) | **0.32%** developed uveitis within 3 months | 67,517 newly treated adults | 57 |
|  | SOURCE Database (β-blockers) | **1.95%** | Same | 57 |
|  | SOURCE Database (α-agonists) | **1.63%** | Same | 57 |
|  | SOURCE Database (CAIs) | **1.68%** | Same | 57 |
| **Bisphosphonates** | Nitrogen-containing BPs | **0.04%–1%** across postmarketing/pharmacoepidemiologic estimates | Combined surveillance data | 7 |
|  | All BPs | **7.9 per 10,000** new users (180-day cumulative incidence); RR **1.23** (CI 0.85–1.79) | U.S. Veterans cohort | 63 |
|  | Alendronate, Risedronate | **0.05%** hospital-treated uveitis; **40–45 per 1,000 PY** topical steroid Rx | National administrative registry | 62 |
|  | Zoledronic acid | **0.8–1.1%** anterior uveitis | Prospective studies | 108,109 |
| **Anti-VEGF** | Brolucizumab | **4.6% (16/345 eyes)** developed anepisode of IOI | Retrospective chart review | 72 |
|  | All | **0.05-1.1%** bevacizumab  **0.005-1.9%** ranibizumab  **0.05-2.1%** aflibercept  **4.4%** brolucizumab | Retrospective study | 110 |
| **Antivirals** | Cidofovir | **14-26%** with intravitreal cidofovir  **26-59%** with intravenous cidofovir | Literature Review | 47 |
|  | Interferon | **0.88% (1/114 patients)** developed bilateral anterior uveitis with pegylated IFN-a | Prospective study in a clinical trial | 91 |
| **DMARDs** | TNF inhibitors (US population study) | **43 cases** with etanercept  **14 cases** with infliximab  **2 cases** with adalimumab | Population-based study in US | 97 |
|  | TNF Inhibitors (Swedish Rheumatology Register) | **HR 3.86** for etanercept versus adalimumab  **HR 1.99** for etanercept versus infliximab  HR for infliximab versus adalimumab not statistically significant | Retrospective cohort study in Sweden | 96 |
|  | Other Biologics | **1.3% (5/456 patients)** new onset uveitis with secukinumab  **0.2% (3/1,491 patients)** de novo uveitis with tocilizumab | Retrospective observational study in Sweden, Retrospective chart review in France | 102,103 |

**Abbreviation:** ICI: immune checkpoint inhibitor; CTLA-4: cytotoxic T-lymphocyte–associated protein 4; PD-1: programmed cell death protein 1; PD-L1: programmed death-ligand 1; PY: person-years; IRIS: Intelligent Research in Sight registry; VKH: Vogt–Koyanagi–Harada; HBV: hepatitis B virus; HPV: human papillomavirus; MMR: measles, mumps, and rubella; VZV: varicella zoster virus; COVID-19: coronavirus disease 2019; FQ: fluoroquinolone; HR: hazard ratio; NS: not significant; SOURCE: Sight Outcomes Research Collaborative; PGAs: prostaglandin analogs; CAIs: carbonic anhydrase inhibitors; BPs: bisphosphonates; RR: relative risk; CI: confidence interval; IOI: intraocular inflammation; IFN-α: interferon alpha; DMARDs: disease-modifying anti-rheumatic drugs; TNF: tumor necrosis factor; US: United States; UK: United Kingdom; Rx: prescription.
